# Supplementary material for: Early Developmental Perturbations in a Human Stem Cell Model of MODY5/HNF1B Pancreatic Hypoplasia
Source: PubMed Central journal article supplement — Stem Cell Reports. 2016 Feb 11;6(3):357–67. doi: 10.1016/j.stemcr.2016.01.007 (PMC4788763; doi:10.1016/j.stemcr.2016.01.007), 2016-02-11

## Early Developmental Perturbations in a Human Stem Cell Model of MODY5/HNF1B Pancreatic Hypoplasia

Adrian Kee Keong Teo,<sup>1,2,3,4,5,\*</sup> Hwee Hui Lau,<sup>2</sup> Ivan Achel Valdez,<sup>1</sup> Ercument Dirice,<sup>1</sup> Erling Tjora,<sup>6,7</sup> Helge Raeder,<sup>6,7</sup> and Rohit N. Kulkarni<sup>1,\*</sup>

<sup>1</sup>Section of Islet Cell and Regenerative Biology, Joslin Diabetes Center, Department of Medicine, Brigham and Women's Hospital, Harvard Stem Cell Institute, Harvard Medical School, One Joslin Place, Boston, MA 02215, USA

<sup>2</sup>Discovery Research Division, Institute of Molecular and Cell Biology, 61 Biopolis Drive, Proteos #06-07, Singapore 138673, Singapore

<sup>3</sup>School of Biological Sciences, Nanyang Technological University, Singapore 637551, Singapore

<sup>4</sup>Department of Biochemistry, Yong Loo Lin School of Medicine, National University of Singapore, Singapore 117596, Singapore

<sup>5</sup>Lee Kong Chian School of Medicine, Nanyang Technological University, Singapore 308232, Singapore

<sup>6</sup>Department of Pediatrics, Haukeland University Hospital, 5021 Bergen, Norway

<sup>7</sup>Department of Clinical Science, KG Jebsen Center for Diabetes Research, University of Bergen, 5021 Bergen, Norway

\*Correspondence: [ateo@imcb.a-star.edu.sg](mailto:ateo@imcb.a-star.edu.sg) (A.K.K.T.), [rohit.kulkarni@joslin.harvard.edu](mailto:rohit.kulkarni@joslin.harvard.edu) (R.N.K.)

<http://dx.doi.org/10.1016/j.stemcr.2016.01.007>

This is an open access article under the CC BY-NC-ND license (<http://creativecommons.org/licenses/by-nc-nd/4.0/>).

### SUMMARY

Patients with an *HNF1B*<sup>S148L/+</sup> mutation (MODY5) typically exhibit pancreatic hypoplasia. However, the molecular mechanisms are unknown due to inaccessibility of patient material and because mouse models do not fully recapitulate MODY5. Here, we differentiated MODY5 human-induced pluripotent stem cells (hiPSCs) into pancreatic progenitors, and show that the *HNF1B*<sup>S148L/+</sup> mutation causes a compensatory increase in several pancreatic transcription factors, and surprisingly, a decrease in *PAX6* pancreatic gene expression. The lack of suppression of *PDX1*, *PTF1A*, *GATA4*, and *GATA6* indicates that MODY5-mediated pancreatic hypoplasia is mechanistically independent. Overexpression studies demonstrate that a compensatory increase in *PDX1* gene expression is due to mutant *HNF1B*<sup>S148L/+</sup> but not wild-type *HNF1B* or *HNF1A*. Furthermore, *HNF1B* does not appear to directly regulate *PAX6* gene expression necessary for glucose tolerance. Our results demonstrate compensatory mechanisms in the pancreatic transcription factor network due to mutant *HNF1B*<sup>S148L/+</sup> protein. Thus, patients typically develop MODY5 but not neonatal diabetes despite exhibiting pancreatic hypoplasia.

### INTRODUCTION

Maturity-onset diabetes of the young (MODY) is a type of autosomal dominant monogenic diabetes classically characterized by non-ketotic, non-insulin-dependent diabetes occurring before the age of 25 years (Teo et al., 2013a). Many MODY genes are pancreatic developmental transcription factors, with the notable exception of *GCK*, *CEL*, and *INS*. Although MODY was discovered more than two decades ago, the molecular mechanisms underlying transcription factor MODY in humans is still largely unclear because mouse models do not fully recapitulate this disease (Maestro et al., 2007) and the lack of a suitable human model.

Patients with MODY5 commonly exhibit pancreatic hypoplasia due to an autosomal dominant mutation in the *HNF1B* gene (Edghill et al., 2006). *HNF1B* is a member of the complex pancreatic transcription factor network which includes *HNF1A* and *HNF4A*. *HNF1B*<sup>+</sup> cells in the pancreatic trunk epithelium are multipotent pancreatic progenitors which play a role in endocrine and exocrine development (Haumaitre et al., 2005). Although MODY5 was discovered in 1997, to date the effects of an autosomal dominant mutation in *HNF1B* on human pancreas development and the molecular mechanisms underlying pan-

creatic hypoplasia remain not fully understood. MODY5 phenotype in humans cannot be phenocopied by *Hnf1b*<sup>+/-</sup> mice since they do not develop diabetes (Haumaitre et al., 2005), highlighting the need for a suitable human model to study the perturbations in pancreas development (Teo et al., 2013a).

Human-induced pluripotent stem cell (hiPSC)-derived pancreatic cells now provide an excellent opportunity to study this monogenic diabetes phenotype. In this study, we established a well-controlled MODY5-hiPSC pancreatic differentiation model to elucidate the molecular mechanisms underlying MODY5 pancreatic hypoplasia. We differentiated four control and six mutant hiPSC lines, and observed that mutant *HNF1B*<sup>S148L/+</sup> elicits a compensatory increase in definitive endoderm (DE) and pancreatic transcription factor gene expression. Mutant *HNF1B*<sup>S148L</sup> directly accounted for an increased *PDX1* gene expression. These pancreatic transcription factor network perturbations could possibly explain the occurrence of maturity-onset diabetes rather than neonatal diabetes despite pancreatic hypoplasia. Importantly, pancreatic *PAX6* gene expression, known to be important for pancreatic  $\beta$ -cell function, was distinctly down-regulated in MODY5 pancreatic progenitors, which in part explains the early-onset diabetes and pancreatic hypoplasia in MODY5 patients.

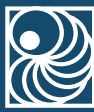

## RESULTS

### Establishment of a Human Stem Cell Model for MODY5

We recently reported the derivation of several hiPSC lines from a MODY5 family (Haldorsen et al., 2008) for in vitro disease modeling of monogenic diabetes (Teo et al., 2013b). Our experimental design included a “node” comprising a healthy family member (N805-6) and two members of the family with an autosomal dominant (S148L) mutation in the *HNF1B* gene, of which one of them has developed diabetes (N805-2) whereas the other has not (N805-1) (Figure 1A). Three independent hiPSC lines from each subject were established (iN805-6A/B/C, iN805-1A/B/C, and iN805-2A/B/C) and verified for the absence or presence of the S148L (C443T in exon 2) mutation in the *HNF1B* gene (Figures 1B and S1A).

We then set out to establish a human pancreatic differentiation protocol for disease modeling of MODY5 in vitro (Figure 1C) based on a chemically defined medium (no serum) (Teo et al., 2014), which is a modified version of our recently reported protocol (Teo et al., 2012, 2015). Careful time-course analyses of differentiated control hiPSCs (derived from AG16102) (Teo et al., 2013b) indicated that pluripotency factors *OCT4* and *NANOG* plummet by day 3, and that hiPSCs transit through *EOMES*+ *MIXL1*+ mesendoderm before differentiating into DE marked by *CXCR4*, *SOX17*, *GATA4*, and *GATA6* (Figure 1D).

Further differentiation toward foregut endoderm and pancreatic progenitors by day 17 revealed an up-regulation of numerous key pancreatic progenitor markers such as *ISL1*, *HLXB9*, *HNF1B*, *PAX6*, *SOX9*, *PDX1*, *PTF1A*, *RFX6*, *NEUROD1*, *HNF6*, *DLK1*, *SOX4*, and *MAFB*, indicating that our pancreatic differentiation protocol is suitable for studying the impact of *HNF1B*<sup>S148L/+</sup> mutation on early pancreatic development and its transcriptional network (Figures 1E and S1B). Immunostaining on day 12 and fluorescence-activated cell sorting (FACS) analyses on day 17 further confirmed the protein expression of key pancreatic developmental genes (Figures S1C and S1D). Since *HNF1B* transcripts exhibit peak expression between days 7 and 10, we performed genome-wide microarray analyses on day-10 differentiated control hiPSCs, and confirmed the up-regulation of pancreas-related genes such as *PDX1*, *HNF1B*, *ISL1*, *RFX6*, *PAX6*, *GATA4*, *GATA6*, *SOX9*, and *PTF1A*, and a reciprocal down-regulation of numerous pluripotency-related genes (Figures 1F and Table S1). Gene ontology (GO) analyses on up- and down-regulated genes (fold change >2) indicated general changes in developmental processes and possibly a down-regulation of vascular development (Figure S2A).

### MODY5-hiPSC-Derived Pancreatic Progenitors Exhibit a Compensatory Increase in DE and Pancreatic Markers but Down-Regulation of PAX6 Gene Expression

We first differentiated the MODY5-hiPSCs into DE (day 3), gut endoderm (days 5–7), and early foregut progenitors (day 10) (Figure 2). *Hnf1β* gene is expressed as early as embryonic day 8.75 (E8.75) in the mouse primitive gut/foregut (Ott et al., 1991), corresponding to ~days 3–7 of the hiPSC in vitro differentiation. Interestingly, we observed an early compensatory increase in DE markers *CXCR4*, *SOX17*, *FOXA2*, *GATA4*, and *GATA6* on day 5 and beyond (Figure 2) in the mutant hiPSCs, just when *HNF1B* gene is beginning to be expressed (Figure 1E; days 3–5). This suggests that the early (low) expression of mutant *HNF1B*<sup>S148L/+</sup> during gut endoderm development is already causing an early compensatory increase in DE and gut endoderm markers.

Given the phenotypic similarities in pancreatic agenesis/hypoplasia caused by *HNF1B*, *PDX1*, *PTF1A*, *GATA4*, and *GATA6* mutations, we hypothesized that the dorsal pancreatic agenesis in MODY5 (*HNF1B*<sup>S148L/+</sup>) (Haldorsen et al., 2008) could be directly linked to the down-regulation of downstream pancreatic genes *GATA4*, *GATA6*, *PDX1*, and *PTF1A*. Surprisingly, time-course transcriptional analyses of MODY5-hiPSC-derived pancreatic progenitors indicate higher gene expression of *HNF1B*, *PDX1*, *GATA4*, and *GATA6* in mutant hiPSCs (iN805-1A/B/C and iN805-2A/B/C; three independent lines; each in biological triplicate) compared with two control hiPSCs (non-family-related control iAG16102 and family control iN805-6A/B; two independent lines; each in biological triplicate) (Figure 3A). These findings were also substantiated by immunostaining of *HNF1B* and *PDX1* on day 12 (Figure 3B; representative of two to three hiPSC lines) and FACS analyses of *SOX9* and *PDX1* on day 17 (Figure 3C; two to three hiPSC lines per subject were pooled together) in MODY5-hiPSC-derived pancreatic progenitors.

Subsequently, to address the hypothesis that mutant *HNF1B*<sup>S148L/+</sup> results in its decreased expression and thus leads to pancreatic hypoplasia and MODY, we analyzed the transcriptional profile to potentially identify a gene(s) which is down-regulated in the mutant hiPSC-derived pancreatic progenitors. Contrary to expectations, we found a compensatory increase in *FOXA2*, *ISL1*, *HLXB9*, and *RFX6* (Figures S2B and S2C), suggesting that this set of genes (including *HNF1B*, *PDX1*, *GATA4*, and *GATA6*) play an important role in alleviating the negative effects of mutant *HNF1B*<sup>S148L/+</sup> so as to delay the overall impact of pancreatic hypoplasia and/or mutant *HNF1B*<sup>S148L/+</sup> on diabetes onset. Surprisingly, *PAX6* was the singular gene among the many examined to exhibit down-regulation

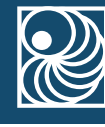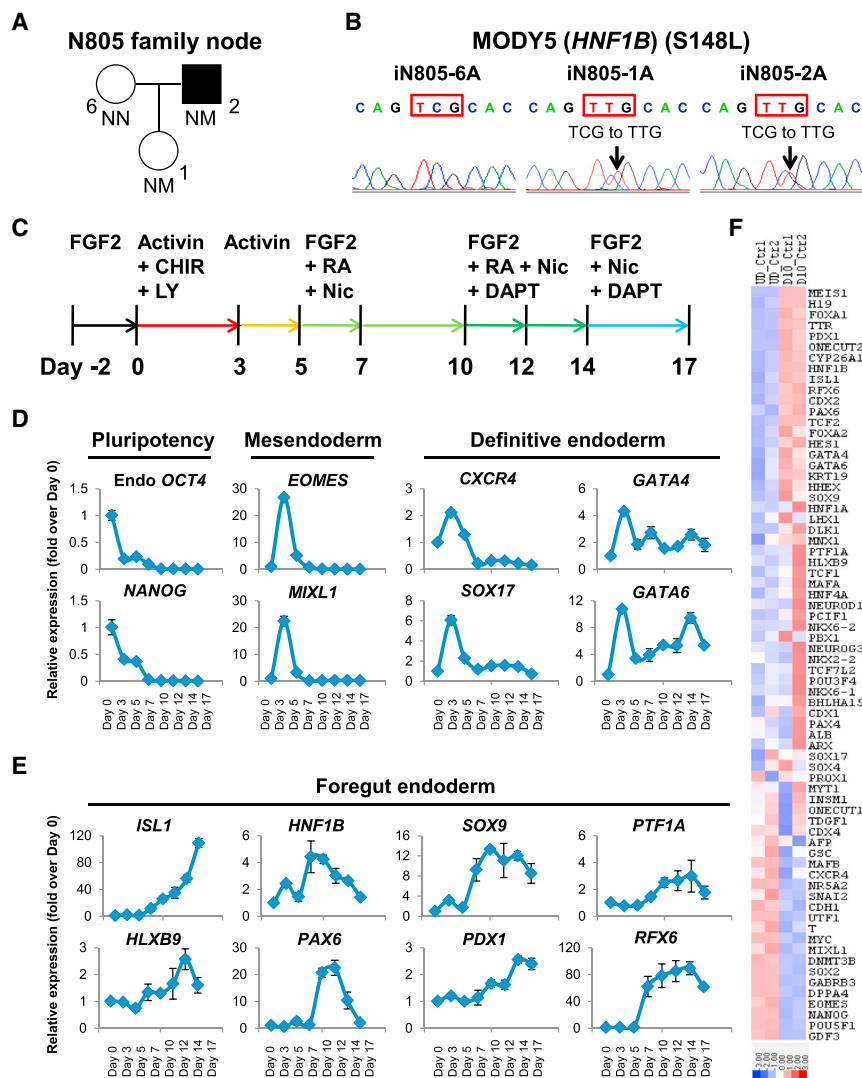

**Figure 1. Establishment of a Human Stem Cell Model for MODY5**

(A) N805 family node pedigree for MODY5 family. Square denotes male, circles denote females, solid symbol denotes diabetes, NN denotes no mutation, and NM denotes mutation. N805-6 is a family control, N805-1 has *HNF1B*<sup>S148L/+</sup> phenotype but no diabetes, whereas N805-2 has *HNF1B*<sup>S148L/+</sup> phenotype and is diabetic.

(B) S148L (C443T in exon 2) mutation (or lack thereof) in *HNF1B* has been verified in iN805 hiPSCs at least three times.

(C–E) Schematic representation of a human pancreatic differentiation protocol for disease modeling of MODY5 in vitro. (C) CHIR99021 (CHIR) is a GSK-3 inhibitor whereas LY294002 (LY) is a PI3K inhibitor. Expression of (D) pluripotency (*OCT4* and *NANOG*), mesendoderm (*EOMES* and *MIXL1*), definitive endoderm (*CXCR4*, *SOX17*, *GATA4*, and *GATA6*) and (E) foregut endoderm (*ISL1*, *HLXB9*, *HNF1B*, *PAX6*, *SOX9*, *PDX1*, *PTF1A*, and *RFX6*) markers in control hiPSCs differentiated for 17 days. All error bars indicate SD of three biological replicates in an independent experiment.

(F) Gene-expression heatmap of representative pluripotency, mesendoderm, definitive endoderm, and pancreas-related genes in undifferentiated (first two columns) and day-10 differentiated (last two columns) control hiPSCs (up-regulation in red, down-regulation in blue). The colors in the heatmap depict gene expression in units of SD from the mean across all samples. Asterisks indicate genes for which mutations are known to result in pancreatic hypoplasia/agenesis. See also Figures S1 and S2.

in mutant hiPSC-derived pancreatic progenitors (Figure 3A). Following this candidate gene approach, we performed microarray analyses for cells obtained from days 0, 12, and 17 (Figure S3A and Table S2). Reassuringly, our genome-wide analyses indicated that our candidate gene approach has captured all the key changes in pancreatic genes: increase in *PDX1*, *ISL1*, *HNF1B*, *TCF2*, *RFX6*, *FOXA2*, *GATA4*, *GATA6*, and *HLXB9* (*MNX1*) expression in the mutant hiPSC-derived pancreatic progenitors (Figure S3A). In addition, *PAX6* was also the most relevant pancreatic gene (expressed in our differentiation) to be down-regulated in the mutant hiPSC-derived pancreatic progenitors (Figure S3A). Further GO analyses on the up- and down-regulated genes (fold change >2) on days 12 and 17 mostly reflected changes in developmental processes (Figures S3B and S3C). Uniquely, neural develop-

ment appeared to be more down-regulated in MODY5 pancreatic progenitors on day 17 (Figure S3C).

We then performed chromatin immunoprecipitation (ChIP) analyses and confirmed that HNF1B binds onto the genomic loci of *HLXB9* and *HNF1B* (Figure S3D), suggesting that these two genes could be the earliest mediators of pancreatic transcription factor network control. To evaluate whether the HNF1B mutation affected pancreatic progenitor cell growth, we performed a cell counting assay and, interestingly, observed that there is a huge retardation of cell growth from day 12 onward, when the mutant HNF1B protein exhibits peak expression (Figure S3E). This strongly suggests that the mutant HNF1B protein affects pancreatic cell growth, thereby accounting for the pancreatic hypoplasia phenotype in MODY5.

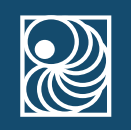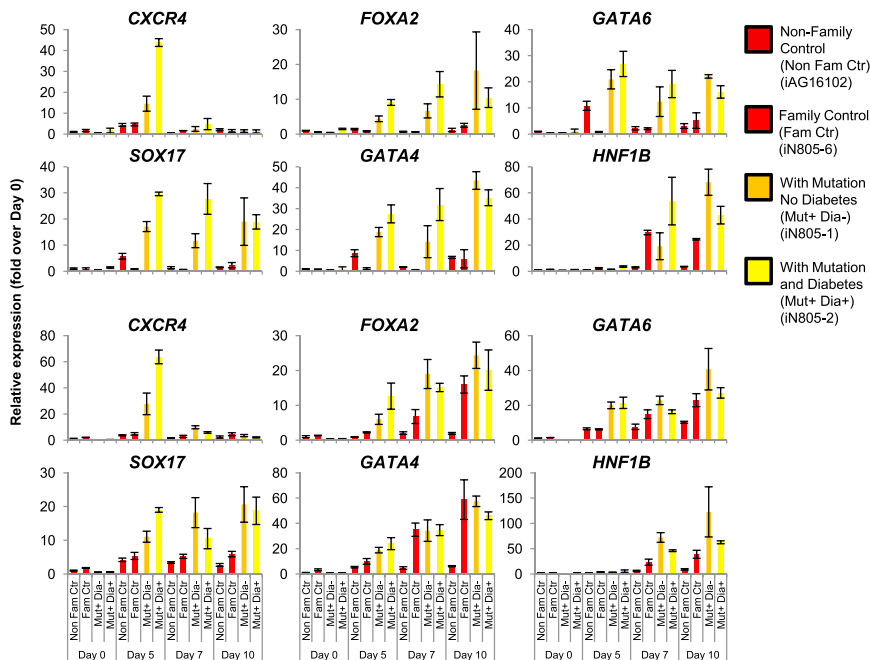

**Figure 2. Transcriptional Perturbations in MODY5-hiPSC-Derived Early Pancreatic Progenitors**

Gene expression of *CXCR4*, *SOX17*, *FOXA2*, *GATA4*, *GATA6*, and *HNF1B* in a non-family control and in iN805 family hiPSCs differentiated for 0, 5, 7 and 10 days. Data are representative of at least two independent hiPSC lines per subject. Replicate experiments are presented. The experiments were replicated at least twice. All error bars indicate SD of three biological replicates in an independent experiment. See also Figures S2 and S3.

### Wild-Type *HNF1B* Suppresses, While Mutant *HNF1B* Increases, *PDX1* Gene Expression

The compensatory increase in both *HNF1B* and *PDX1* gene expression in the mutant hiPSC-derived pancreatic progenitors prompted us to further investigate this molecular relationship. FACS analyses performed on day-12 differentiated control hiPSCs confirmed that 36.2% are *PDX1*<sup>+</sup> (Figure 4A) whereas 91.4% are *HNF1B*<sup>+</sup> (Figure 5A), corroborating their transcriptional profile (Figure 1E). We first performed luciferase assays to study the transcriptional regulation of cardinal pancreatic gene *PDX1* (Stoffers et al., 1997) by *HNF1B*. Overexpression of *HNF1B* from days 10–12 in differentiated control hiPSCs surprisingly suppressed *PDX1* transcriptional activity, in both the ~7 kb full-length *PDX1* promoter construct and a construct containing areas I–III of *PDX1* promoter (~2.4 kb) known to be the principal control region of *PDX1* gene expression (Gerrish et al., 2000) (Figure 4B). This indicates a repressive pattern of *HNF1B* whereby *HNF1B* gene expression is decreasing when *PDX1* is beginning to be expressed from days 10–12 (Figure 1E).

*HNF1B* protein functions either as a homodimer or a heterodimer with the structurally related *HNF1A* (Mendel et al., 1991; Rey-Campos et al., 1991). We thus overexpressed both *HNF1B* and *HNF1A* from days 10–12 in differentiated control hiPSCs, only to discover that *HNF1A* does not have any transcriptional regulatory effect on *PDX1*, at least during this early pancreatic progenitor stage when *PDX1* is beginning to be expressed (Figure 4C). This is consistent with the observation that *HNF1A* is expressed

very late during pancreatic differentiation (Figure S1D). Thus, the suppressive effect of *HNF1B* on *PDX1* transcriptional activity is likely due to homodimers in action.

Very little is known about the target genes of *HNF1B* in a developing pancreas. *HNF4A* is one potential candidate (Thomas et al., 2001). *HNF1* binding sites have been found to be present in pancreas-/islet-specific P2 (Thomas et al., 2001) and P1 promoters (Taraviras et al., 1994) of the *Hnf4a* gene (Eeckhoutte et al., 2003). Thus, we cloned both P1 and P2 promoters of *HNF4A*, and performed similar luciferase assays. Dismally, *HNF1B* overexpression did not have any effect on P1 promoter and only a very marginal effect on P2 promoter activity in our stem cell model on day 12 (Figure S4A), suggesting that the regulation of *HNF4A* by *HNF1B* (or *HNF1A*) is likely apparent only at later stages of pancreatic development.

To delineate whether the wild-type *HNF1B* or mutant *HNF1B*<sup>S148L</sup> allele is responsible for the compensatory increase in pancreatic gene expression (Figure 3A), we next overexpressed wild-type *HNF1B* or mutant *HNF1B*<sup>S148L</sup> from days 7–10 in differentiated control hiPSCs. Interestingly, overexpression of mutant *HNF1B*<sup>S148L</sup> resulted in an increase in *PDX1* gene expression but was insufficient to up-regulate other pancreatic transcription factors such as *GATA4*, *GATA6*, or *SOX9* (Figures 4D and S4B). On the contrary, overexpression of wild-type *HNF1B* from days 7–10 did not alter the expression level of *PDX1* or other genes we investigated, including *GATA4*, *GATA6*, and *SOX9* (Figures 4E and S4C). ChIP analyses performed on *HNF1B* also did not reveal binding on *PDX1* genomic loci (Cebola et al.,



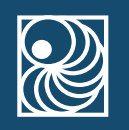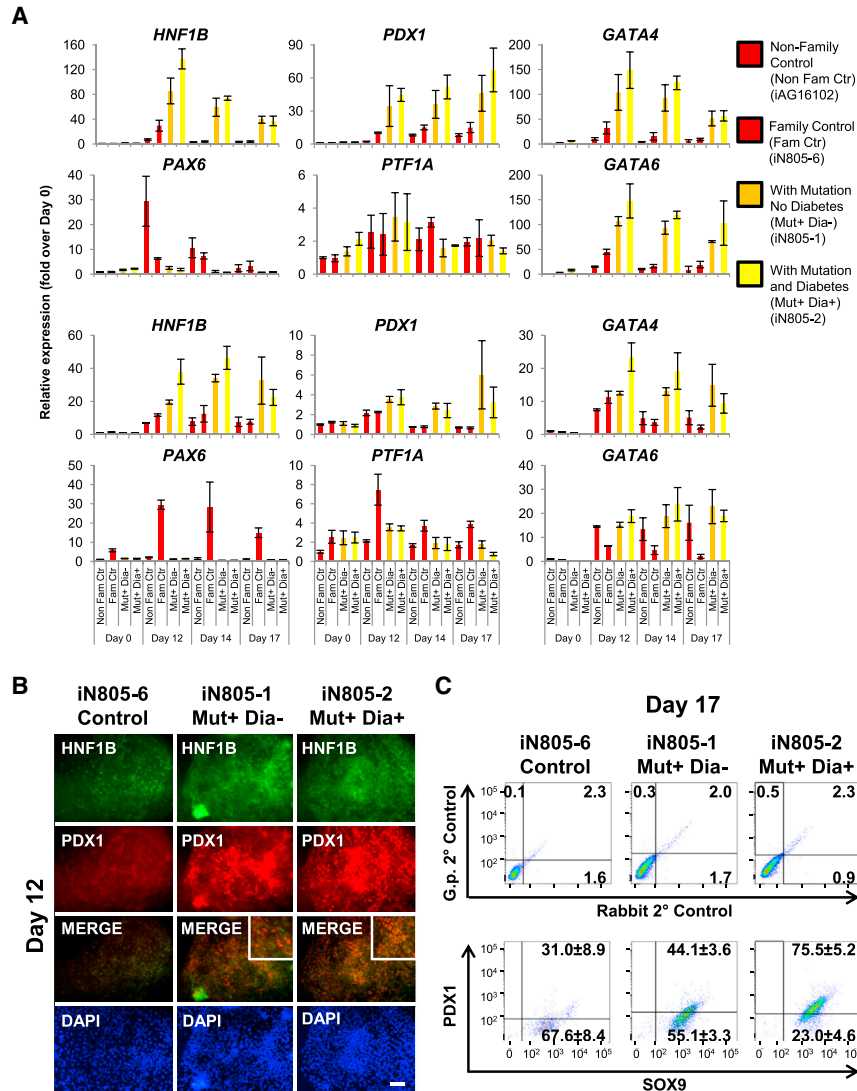

**Figure 3. Transcriptional Perturbations in MODY5-hiPSC-Derived Pancreatic Progenitors**

(A) Gene expression of *HNF1B*, *PAX6*, *PDX1*, *PTF1A*, *GATA4*, and *GATA6* in a non-family control and in iN805 family hiPSCs differentiated for 0, 12, 14, and 17 days. Data are representative of at least two independent hiPSC lines per subject. Replicate experiments are presented. The experiments were replicated at least twice. All error bars indicate SD of three biological replicates in an independent experiment.

(B) Immunostaining for HNF1B and PDX1 on iN805 hiPSCs differentiated for 12 days. Data are representative of at least two independent hiPSC lines per subject. The experiment was replicated at least twice. Scale bar, 200  $\mu$ m.

(C) The percentage of PDX1<sup>+</sup> and SOX9<sup>+</sup> cells after differentiation of iN805 hiPSCs (two to three hiPSC lines per subject were pooled together) for 17 days.

See also Figures S2 and S3.

2015 and data not shown). Last but not least, qPCR and western blot analyses confirmed that the HNF1B and HNF1A genes/proteins were overexpressed successfully (Figures S4D and S4E). Together, these data indicate that mutant *HNF1B*<sup>S148L</sup> (and not *HNF1B* or *HNF1A*) gene expression is responsible for the compensatory increase in *PDX1* gene expression in mutant hiPSC-derived pancreatic progenitors. The molecular mediator(s) of increased *GATA4* and *GATA6* gene expression in mutant hiPSC-derived pancreatic progenitors is unclear and requires further investigation.

### HNF1B Is Not Directly Involved in Gene Regulation of PAX6

*Pax6* is known to be expressed during early pancreatic development (E9–9.5) in cells committed exclusively to the endocrine cell fate (Ashery-Padan et al., 2004; Sander

et al., 1997). Among the transcription factors we analyzed, only *PAX6* transcripts were clearly down-regulated (Figure 3A). Since *PAX6* exhibits a similar (but right-shifted) gene-expression profile to that of *HNF1B*, we sought to investigate whether HNF1B or HNF1B<sup>S148L</sup> is involved in the regulation of *PAX6* gene expression. FACS analyses on day-12 differentiated control hiPSCs (*PAX6* peak transcript expression) (Figure 1E), indicated that 27.2% are PAX6<sup>+</sup>, of which 22.0% are also HNF1B<sup>+</sup> (Figure 5A). This percentage of PAX6<sup>+</sup> cells is consistent with the report that *PAX6* protein is detected only in a small subset of cells in the pancreatic endoderm at E9–9.5 (Sander et al., 1997). Luciferase assays performed on day-10 differentiated control hiPSCs indicated that *PAX6* promoter is active (Figure 5B). However, overexpression of *HNF1B* and/or *HNF1A* had no impact, whereas overexpression of mutant *HNF1B*<sup>S148L</sup>

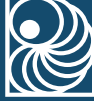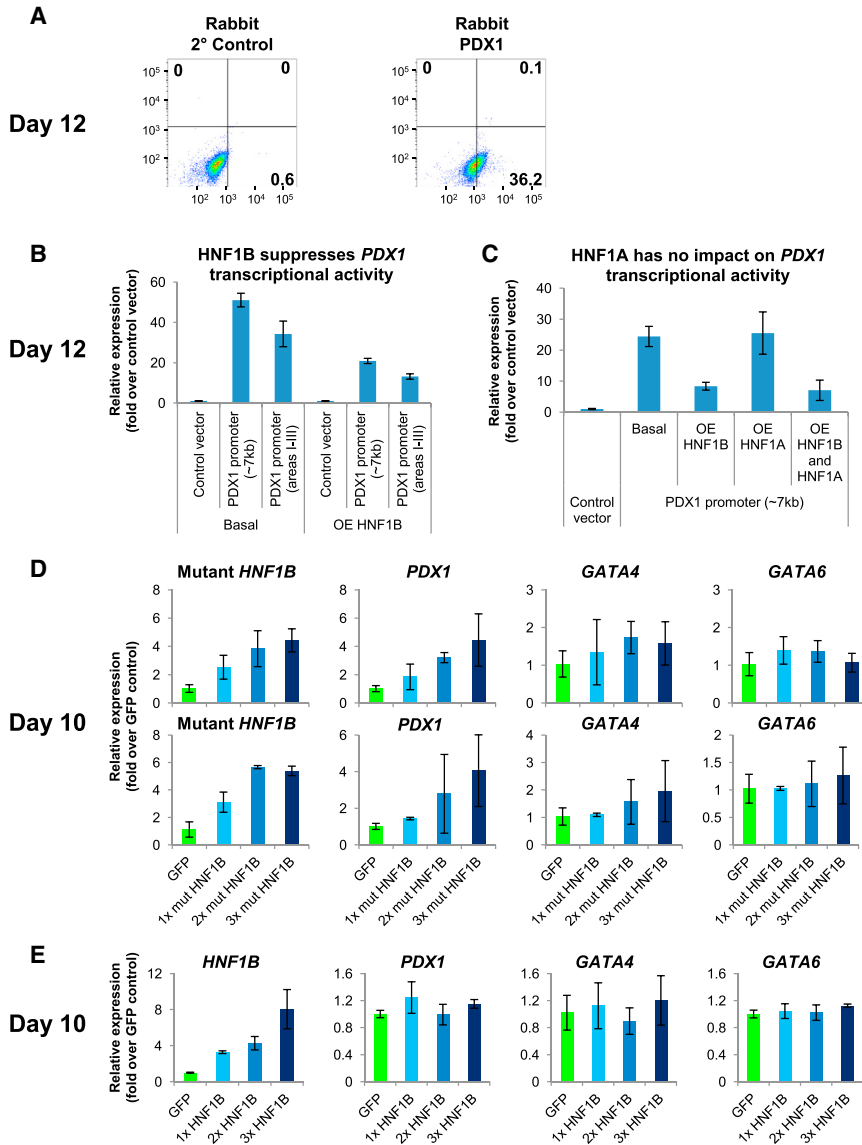

**Figure 4. Mutant HNF1B Is Responsible for the Increase in PDX1 Gene Expression**

(A) The percentage of PDX1<sup>+</sup> cells after differentiation of hiPSCs for 12 days.

(B and C) Luciferase assay showing the effect of (B) *HNF1B* and/or (C) *HNF1A* overexpression on *PDX1* transcriptional activity in hiPSCs differentiated for 12 days.

(D and E) Expression of pancreas-related (*HNF1B*, mutant *HNF1B*<sup>S148L/+</sup>, *PDX1*, *GATA4*, and *GATA6*) markers in hiPSCs differentiated for 10 days and overexpressing increasing amounts of (D) mutant *HNF1B*<sup>S148L</sup> or (E) *HNF1B* from days 7–10. The replicate experiment for mutant *HNF1B*<sup>S148L</sup> is presented.

The experiments were replicated at least twice. All error bars indicate SD of three biological replicates in an independent experiment. See also Figure S4.

only resulted in a marginal suppression of *PAX6* promoter activity (Figure 5C). Overexpression of wild-type *HNF1B* from days 7–10 in differentiated control hiPSCs (Figure 4E) did not alter *PAX6* gene-expression levels (Figure 5D). Overexpression of mutant *HNF1B*<sup>S148L</sup> alone (Figure 4D) was not sufficient to suppress *PAX6* gene-expression levels (Figure 5E). Furthermore, *HNF1B* was not found to bind onto the *PAX6* promoter region (Cebola et al., 2015 and data not shown). This indicates that the decrease in *PAX6* gene expression is an indirect effect of the mutant *HNF1B*<sup>S148L/+</sup> and is possibly a result of the altered pancreatic transcription factor network.

The loss of *Pax6* expression early on during pancreatic development reduces pancreatic insulin content (Ashery-Padan et al., 2004; Sander et al., 1997) and affects postnatal

pancreatic β-cell function, which results in early-onset diabetes (Ashery-Padan et al., 2004). In this study, we found that *PAX6* gene expression is decreased in mutant (*HNF1B*<sup>S148L/+</sup>) hiPSC-derived pancreatic progenitors. To translate our findings to the MODY5 patients, we tracked the clinical phenotype of the N805 patients over time. N805-2 (*HNF1B*<sup>S148L/+</sup>) exhibited high fasting glucose levels (16.3 mmol/l) and required insulin (58–68 units/24 hr), whereas N805-1 (*HNF1B*<sup>S148L/+</sup>), who was not diabetic, presented with elevated fasting glucose levels (normal range: 4.0–6.0 mmol/l) and elevated 2-hr glucose levels after a standard oral glucose challenge (75 g) (impaired glucose tolerance range: 7.8–11.1 mmol/l) after the age of 8 years (Figure 5F). N805-2 presented low fasting insulin (2.4 mIE/l) whereas N805-1 exhibited a transition

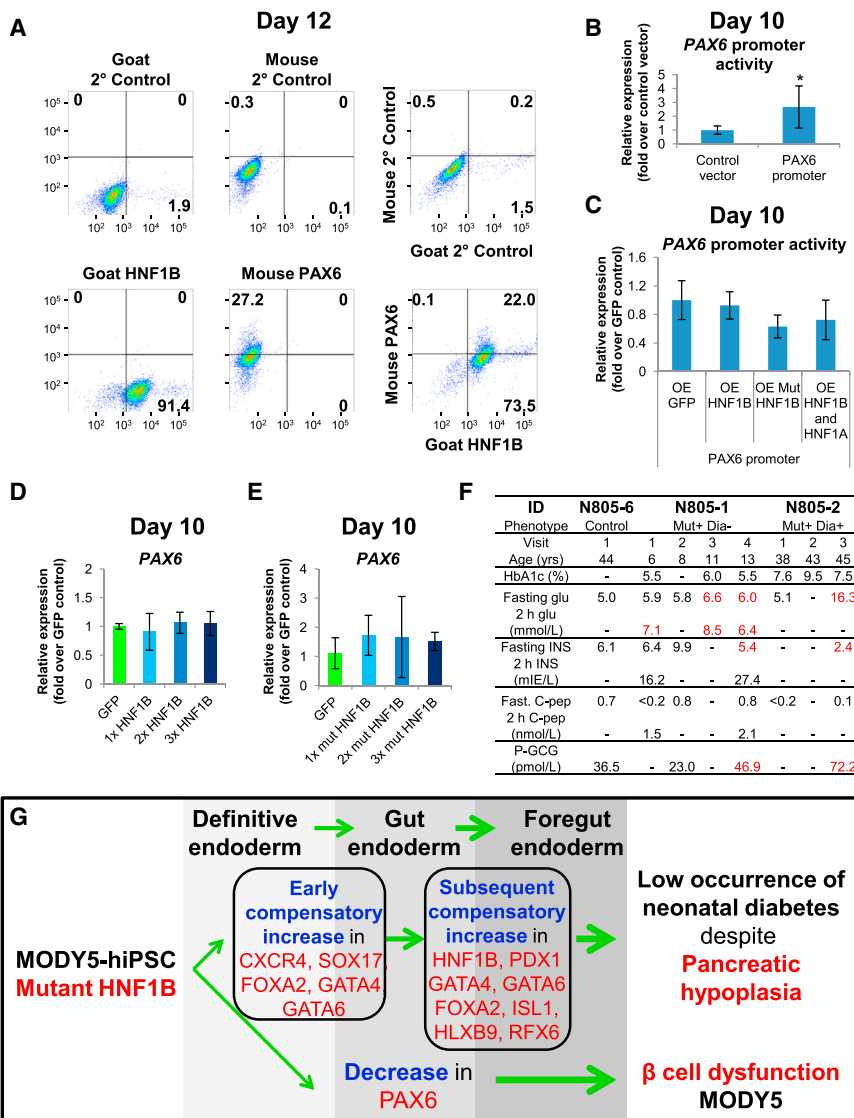

**Figure 5. HNF1B Is Not Directly Involved in Gene Regulation of PAX6**

(A) The percentage of HNF1B<sup>+</sup> and PAX6<sup>+</sup> cells after differentiation of hiPSCs for 12 days.

(B and C) Luciferase assay showing (B) basal PAX6 promoter activity and (C) the effect of HNF1B and/or HNF1A overexpression on PAX6 promoter activity in hiPSCs differentiated for 10 days.

(D and E) Expression of PAX6 in hiPSCs differentiated for 10 days and overexpressing increasing amounts of (D) HNF1B or (E) mutant HNF1B<sup>S148L</sup> from days 7–10. The experiments in (B) to (E) were replicated at least twice. All error bars indicate SD of three biological replicates in an independent experiment. \**p* < 0.05 by two-sided Student's *t* test on three independent experiments.

(F) Clinical characteristics of MODY5 patients including HbA1c (%), blood glucose (glu), insulin (INS), C-peptide (C-pep), and plasma glucagon (P-GCG) concentrations. (G) Model depicting the impact of mutant HNF1B<sup>S148L/+</sup> on early human pancreas development. Mutant HNF1B<sup>S148L/+</sup> evokes an early increase in definitive endoderm genes followed by a subsequent increase in pancreas-related foregut endoderm genes. Thus, although MODY5 patients typically develop pancreatic hypoplasia there is a low occurrence of neonatal diabetes. The decrease in early PAX6 gene expression in pancreatic progenitors may partly account for the subsequent  $\beta$ -cell dysfunction in MODY5 patients.

from normal to subnormal levels of fasting insulin, at 5.4 mIE/l (normal range: 6.0–27.0 mIE/l) (Figure 5F). As diabetes develops, plasma glucagon levels usually rise due to impaired  $\alpha$ -cell glucose-sensing function and lack of appropriate suppression (Dunning et al., 2005). This scenario fits with the substantially elevated plasma glucagon levels (72.2 pmol/l) in the diabetic individual N805-2 and the moderately elevated plasma glucagon levels in the pre-diabetic individual N805-1 (46.9 pmol/l; normal range: 14.3–43 pmol/l) (Figure 5F).

## DISCUSSION

We have successfully established a human stem cell model to study the molecular mechanisms underlying MODY5.

Our experimental design, which includes a non-family control hiPSC line and three independent hiPSC lines from each of the three subjects in a MODY5 family, is a well-controlled experimental “node” which minimizes potential genetic background influence and line-to-line variation in hiPSC differentiation. While we observe HNF1B gene expression in the family control data to resemble that in the MODY5-hiPSC-derived pancreatic progenitors on rare occasions (Figure 2), suggesting initial genetic background effects (difference between control lines becomes attenuated later), the use of non-family control samples provides confidence in the overall distinct phenotypes we observed in our in vitro stem cell model. In addition, more than 90% of day-12 differentiated cells are HNF1B<sup>+</sup>, making our pancreatic differentiation protocol well suited for studying MODY5.



HNF1B has been reported to be a transcriptional activator (Rey-Campos et al., 1991), but any positive regulation of *PDX1* gene expression by HNF1A and/or HNF1B could be specific to pancreatic  $\beta$  cells (Ben-Shushan et al., 2001) and not pancreatic progenitors, implying that HNF1B and/or HNF1A switch their binding partners during pancreatic development to regulate specificity in gene regulation.

We observed that mutant *HNF1B*<sup>S148L</sup> (and not *HNF1B* or *HNF1A*) gene expression is responsible for the compensatory increase in *PDX1* gene expression in mutant hiPSC-derived pancreatic progenitors. This could, in part, be acting to counter the increased transcriptional repression by wild-type *HNF1B* (Figures 3B and 3C), although increasing *HNF1B* gene expression for 3 days from days 7 to 10 appears to be insufficient to significantly suppress *PDX1* gene expression (Figure 4E). This gene regulation is likely to be indirect, since we did not find HNF1B protein to be bound onto the genomic loci of *PDX1* (Cebola et al., 2015). It is interesting to note that  $\beta$ -cell-specific knockout of *Hnf1 $\beta$*  similarly results in an increase in *Pdx1* gene expression (Wang et al., 2004), indicating that perturbations in *HNF1B* gene expression, either early during pancreatic development or in mature  $\beta$  cells, both prompt compensatory *PDX1* gene expression.

The presence of a wild-type *HNF1B* allele and the combinatorial effects of wild-type-mutant HNF1B dimers in MODY5 (*HNF1B*<sup>S148L/+</sup>) patients partly explains the compensatory up-regulation of numerous pancreatic transcription factors. The lack of down-regulation of critical pancreatic genes *PDX1*, *PTF1A*, *GATA4*, and *GATA6* implies that the mechanism underlying dorsal pancreatic agenesis in MODY5 is independent of these genes, which are also known to result in pancreatic agenesis/hypoplasia when mutated (D'Amato et al., 2010; Lango Allen et al., 2012; Sellick et al., 2004; Stoffers et al., 1997). This compensation in pancreatic transcriptional network due to an *HNF1B* autosomal dominant mutation may also account for the diabetes onset relatively later in life seen in MODY5 compared with the early onset observed in genetic forms of neonatal diabetes (Teo et al., 2013a) (Figure 5G). In this context, it is interesting that the MODY5 subjects with dorsal pancreatic agenesis also exhibit compensatory increase in physiological acinar function with hypersecretion from the remaining ventral portions of the pancreas (Tjora et al., 2013).

*Hnf1 $\beta$* <sup>-/-</sup> mice with pancreatic agenesis exhibit loss of numerous pancreatic genes, including *Pax6* expression (Haumaitre et al., 2005). *Pax6*-deficient pancreatic progenitors that are unable to mature and reach terminal differentiation later in life cannot be rescued by postnatal neogenesis (Ashery-Padan et al., 2004). Thus, the reduction in pancreatic endocrine cell number in *Pax6*<sup>-/-</sup> embryos (Sander et al.,

1997) and altered acinar structure (Hart et al., 2013) could partly account for the pancreatic hypoplasia phenotype in MODY5 patients. Given that *PAX6* directly regulates genes that regulate  $\beta$ -cell function (Ashery-Padan et al., 2004; Wen et al., 2009), we speculate that the loss of *PAX6* gene expression early on in the MODY5 patients also partly accounts for the  $\beta$  and  $\alpha$  islet cell dysfunction, and contributes to their diabetic phenotype (Figure 5G). This concept is concordant with the observations that patients with *PAX6* heterozygous mutations also develop glucose intolerance (Wen et al., 2009; Yasuda et al., 2002). It is interesting to note that administration of exendin-4, a glucagon-like peptide 1 receptor (GLP-1R) agonist, to *Pax6*<sup>+/-</sup> mice can rescue the metabolic abnormalities observed, either via increased insulin secretion or  $\beta$ -cell regeneration (Ding et al., 2009), suggesting a potential for treatment for patients lacking pancreatic *PAX6* gene expression, and the MODY5 patients in this study.

Collectively, we have evaluated the impact of a MODY5-causing point mutation (S148L) in the *HNF1B* gene on human pancreas development using a unique human stem cell model. We report molecular phenotypes (up- and down-regulation of pancreatic genes) when *HNF1B* is increasingly expressed from days 7 to 10, and observed that these phenotypes extend beyond the expression window of HNF1B. These data provide insights into the long-term impact of the MODY5 mutation on the pancreatic transcriptional network and the subsequent development of human pancreatic progenitors into mature functional endocrine cells. This is in agreement with Haumaitre et al. (2006), who indicated that MODY5 is certainly due to defective morphogenesis of the pancreas. Future efforts to further differentiate these hiPSCs into pancreatic  $\beta$  cells will reveal the impact of transcriptional perturbations on  $\beta$ -cell formation and function.

## EXPERIMENTAL PROCEDURES

### Cell Culture

Informed consent was obtained from MODY5 patients. This study was reviewed and approved by the Institutional Review Boards at Haukeland University Hospital and Joslin Diabetes Center, and in accordance with the principles set out in the WMA Declaration of Helsinki and the Department of Health and Human Services Belmont Report. hiPSCs used were tested mycoplasma negative and were cultured as described previously (Teo et al., 2013b, 2014). hiPSCs were differentiated into pancreatic progenitors as described previously (Teo et al., 2014). In general, 2–3 independent hiPSC lines per subject were used, and biological triplicates were used for each hiPSC line.

### Sequencing of MODY5-hiPSCs

The method for sequencing has been described previously (Teo et al., 2013b).



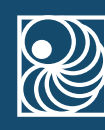

## qRT-PCR, Immunostaining, FACS, Western Blot, and ChIP Analyses

Methods for qRT-PCR, immunostaining, FACS, western blot (Teo et al., 2014), and ChIP analyses (Cebola et al., 2015; Teo et al., 2011, 2015) have been described previously.  $p < 0.05$  indicates statistical significance by Student's *t* test (two-sided; equal variance). In general, qRT-PCR and immunostaining data of MODY5-hiPSC-derived cells are representative of one non-family control hiPSC line (iAG16102), two family control hiPSC lines (iN805-6A/C), and three lines each for the two MODY5 patients (iN805-1A/B/C and iN805-2A/B/C). All error bars indicate SD of three biological replicates. Two to three hiPSC lines per subject were pooled together before being set up in triplicate for FACS analyses. Primers and antibodies used are provided in Table S3.

## Microarray

Microarray was performed by the Molecular Genetics Core Facility at Children's Hospital, Boston. Two biological replicates for undifferentiated and day-10 differentiated control hiPSCs were analyzed. One sample from iAG16102, iN805-6, iN805-1, and iN805-2 each was used for day-0, -12 and -17 analyses.

## Gene Ontology Overrepresentation Analysis

The overrepresentation of GO biological process categories was assessed using DAVID.

## Overexpression Studies

*HNF1B* gene was amplified from cDNA obtained from differentiated hiPSCs using PfuUltra II Fusion HS DNA Polymerase with a melting temperature ( $T_m$ ) of 50°C and extension at 72°C for 2 min. *HNF1B* cDNA was then subcloned into pCDH-FlagV5 vector using EcoRI and XhoI RE sites to obtain pCDH-h*HNF1B*. *HNF1B* cDNA was also subcloned into PCR-Blunt II-TOPO vector, and h*HNF1BC443TF* and h*HNF1BC443TR* primers were used to amplify *HNF1B*<sup>S148L</sup> using PfuUltra II Fusion HS DNA Polymerase with an extension at 72°C for 5 min. *HNF1B*<sup>S148L</sup> cDNA was then subcloned into pCDH-FlagV5 vector using EcoRI and XhoI RE sites to obtain pCDH-h*HNF1B*<sup>S148L</sup>. pCDNA3.1-h*HNF1A* was a gift from Y.-I. Chi. Primers used are provided in Table S3. Day-6 differentiated control hiPSCs were split and replated onto 12-well plates. These cells were transduced with lentiviruses (multiplicity of infection 10, 20, 30 or 50, 100, 200) containing pCDH-*GFP*, pCDH-*HNF1B*, or pCDH-*HNF1B*<sup>S148L</sup> on day 7, washed with PBS on day 8, and harvested on day 10.

## Luciferase Assays

h*PDX1* promoter (~7 kb) was cloned into pGL4.10 using NheI and XhoI RE sites. h*PDX1* promoter/enhancer (areas I–III) was cloned into pGL4.23 using XhoI and BglII RE sites. h*HNF4A* P1 and P2 promoters were cloned into pGL4.10 using KpnI and XhoI RE sites. h*PAX6* promoter (346 bp) containing HNF1B and HNF1A binding sites was a gift from Y.-H. Zhou. Primers used are provided in Table S3. Day-9 differentiated control hiPSCs were split and replated onto 12-well plates. These cells were transfected with h*PDX1* promoter, h*HNF4A* P1 or P2 promoter in the absence and presence of pCDH-*HNF1B*, and/or pCDNA3.1-h*HNF1A* on day 10 and har-

vested on day 12. Day-6 differentiated control hiPSCs were split and replated onto 12-well plates. These cells were transfected with h*PAX6* promoter in the absence and presence of pCDH-*GFP*, pCDH-*HNF1B*, pCDH-*HNF1B*<sup>S148L</sup>, and/or pCDNA3.1-h*HNF1A* on day 7 and harvested on day 10. The method for luciferase assay has been described previously (Teo et al., 2011).

## Hormone Assays

Glucagon was assessed with a radioimmunoassay from Millipore. This assay reports a precision (coefficient of variation) for high levels (72.4 pmol/l) of 10.1%, for intermediate levels (52.2 pmol/l) of 12.6%, and for low levels (28.8 pmol/l) of 9.2%. Prior to analysis, we collected blood samples in plasma tubes containing 250 kIU Trasvlol (Aprotinin) per ml of whole blood. This resulted in a final concentration of approximately 500 kIU Trasvlol per ml of serum or plasma, and the aliquot was frozen at -70°C.

## ACCESSION NUMBERS

Microarray data have been uploaded to GEO with accession number GEO: GSE74885.

## SUPPLEMENTAL INFORMATION

Supplemental Information includes four figures and three tables and can be found with this article online at <http://dx.doi.org/10.1016/j.stemcr.2016.01.007>.

## AUTHOR CONTRIBUTIONS

A.K.K.T. designed the study, performed most of the experiments, collected and analyzed data, and wrote the paper; H.H.L. performed experiments for manuscript revision; I.A.V. performed FACS analyses; E.D. contributed to discussions; E.T. collected patient data; H.R. contributed to the design of the study and to data interpretation; R.N.K. contributed to conceptual discussions, supervised the studies, and edited and approved the paper. All authors discussed the results and commented on the manuscript.

## ACKNOWLEDGMENTS

The hiPSC lines used were derived with support from the Joslin DRC iPS Core Facility (NIH 5 P30 DK036836-27). FACS analysis was supported by the HSCI/DRC Flow Core (NIH P30DK036836). Microarray studies were performed by the Molecular Genetics Core Facility at Children's Hospital Boston, supported by NIH-P50-NS40828 and NIH-P30-HD18655. We thank B. Wagner for assistance with microarray analyses; and K. Tomita, E.K. Tan, N.R. Dunn, Y.-H. Zhou, and Y.-I. Chi for providing plasmids. A.K.K.T. was supported by a Juvenile Diabetes Research Foundation (JDRF) Postdoctoral Fellowship and is currently supported by the Institute of Molecular and Cell Biology (IMCB), A\*STAR, NHG-KTPH SIG/14033, the NUHS-CG Metabolic In-Vitro Core Seed Funding, and the JCO Career Development Award (CDA) 15302FG148, A\*STAR. I.A.V. is supported by an HSCI Sternlicht Director's Fund Award and a NIH F31DK098931 award. E.D. is supported by an Advanced JDRF Postdoctoral Fellowship. H.R. is supported by grants from Bergen Forskningsstiftelse (BFS), the Western Norway Regional Health Authority and the Novo Nordisk



Foundation. R.N.K. is supported by the HSCI, NIH grants RO1 DK 67536, RO1 DK 055523, and RO1103215, and a grant from AstraZeneca.

Received: May 3, 2015

Revised: January 11, 2016

Accepted: January 12, 2016

Published: February 11, 2016

## REFERENCES

- Ashery-Padan, R., Zhou, X., Marquardt, T., Herrera, P., Toubé, L., Berry, A., and Gruss, P. (2004). Conditional inactivation of Pax6 in the pancreas causes early onset of diabetes. *Dev. Biol.* *269*, 479–488.
- Ben-Shushan, E., Marshak, S., Shoshkes, M., Cerasi, E., and Meloul, D. (2001). A pancreatic beta-cell-specific enhancer in the human PDX-1 gene is regulated by hepatocyte nuclear factor 3beta (HNF-3beta), HNF-1alpha, and SPs transcription factors. *J. Biol. Chem.* *276*, 17533–17540.
- Cebola, I., Rodriguez-Segui, S.A., Cho, C.H., Bessa, J., Rovira, M., Luengo, M., Chhatrivala, M., Berry, A., Ponsa-Cobas, J., Maestro, M.A., et al. (2015). TEAD and YAP regulate the enhancer network of human embryonic pancreatic progenitors. *Nat. Cell Biol.* *17*, 615–626.
- D'Amato, E., Giacomelli, F., Giannattasio, A., D'Annunzio, G., Boccardi, R., Musso, M., Lorini, R., and Ravazzolo, R. (2010). Genetic investigation in an Italian child with an unusual association of atrial septal defect, attributable to a new familial GATA4 gene mutation, and neonatal diabetes due to pancreatic agenesis. *Diabet. Med.* *27*, 1195–1200.
- Ding, J., Gao, Y., Zhao, J., Yan, H., Guo, S.Y., Zhang, Q.X., Li, L.S., and Gao, X. (2009). Pax6 haploinsufficiency causes abnormal metabolic homeostasis by down-regulating glucagon-like peptide 1 in mice. *Endocrinology* *150*, 2136–2144.
- Dunning, B.E., Foley, J.E., and Ahren, B. (2005). Alpha cell function in health and disease: influence of glucagon-like peptide-1. *Diabetologia* *48*, 1700–1713.
- Edghill, E.L., Bingham, C., Ellard, S., and Hattersley, A.T. (2006). Mutations in hepatocyte nuclear factor-1beta and their related phenotypes. *J. Med. Genet.* *43*, 84–90.
- Eckhoude, J., Moerman, E., Bouckennooghe, T., Lukoviak, B., Patou, F., Formstecher, P., Kerr-Conte, J., Vandewalle, B., and Laine, B. (2003). Hepatocyte nuclear factor 4 alpha isoforms originated from the P1 promoter are expressed in human pancreatic beta-cells and exhibit stronger transcriptional potentials than P2 promoter-driven isoforms. *Endocrinology* *144*, 1686–1694.
- Gerrish, K., Gannon, M., Shih, D., Henderson, E., Stoffel, M., Wright, C.V., and Stein, R. (2000). Pancreatic beta cell-specific transcription of the pdx-1 gene. The role of conserved upstream control regions and their hepatic nuclear factor 3beta sites. *J. Biol. Chem.* *275*, 3485–3492.
- Haldorsen, I.S., Vesterhus, M., Raeder, H., Jensen, D.K., Sovik, O., Molven, A., and Njolstad, P.R. (2008). Lack of pancreatic body and tail in HNF1B mutation carriers. *Diabet. Med.* *25*, 782–787.
- Hart, A.W., Mella, S., Mendrychowski, J., van Heyningen, V., and Kleinjan, D.A. (2013). The developmental regulator Pax6 is essential for maintenance of islet cell function in the adult mouse pancreas. *PLoS One* *8*, e54173.
- Haumaitre, C., Barbacci, E., Jenny, M., Ott, M.O., Gradwohl, G., and Cereghini, S. (2005). Lack of TCF2/vHNF1 in mice leads to pancreas agenesis. *Proc. Natl. Acad. Sci. USA* *102*, 1490–1495.
- Haumaitre, C., Fabre, M., Cormier, S., Baumann, C., Delezoide, A.L., and Cereghini, S. (2006). Severe pancreas hypoplasia and multicystic renal dysplasia in two human fetuses carrying novel HNF1beta/MODY5 mutations. *Hum. Mol. Genet.* *15*, 2363–2375.
- Lango Allen, H., Flanagan, S.E., Shaw-Smith, C., De Franco, E., Akerman, I., Caswell, R., Ferrer, J., Hattersley, A.T., and Ellard, S. (2012). GATA6 haploinsufficiency causes pancreatic agenesis in humans. *Nat. Genet.* *44*, 20–22.
- Maestro, M.A., Cardalda, C., Boj, S.F., Luco, R.F., Servitja, J.M., and Ferrer, J. (2007). Distinct roles of HNF1beta, HNF1alpha, and HNF4alpha in regulating pancreas development, beta-cell function and growth. *Endocr. Dev.* *12*, 33–45.
- Mendel, D.B., Hansen, L.P., Graves, M.K., Conley, P.B., and Crabtree, G.R. (1991). HNF-1 alpha and HNF-1 beta (vHNF-1) share dimerization and homeo domains, but not activation domains, and form heterodimers in vitro. *Genes Dev.* *5*, 1042–1056.
- Ott, M.O., Rey-Campos, J., Cereghini, S., and Yaniv, M. (1991). vHNF1 is expressed in epithelial cells of distinct embryonic origin during development and precedes HNF1 expression. *Mech. Dev.* *36*, 47–58.
- Rey-Campos, J., Chouard, T., Yaniv, M., and Cereghini, S. (1991). vHNF1 is a homeoprotein that activates transcription and forms heterodimers with HNF1. *EMBO J.* *10*, 1445–1457.
- Sander, M., Neubuser, A., Kalamaras, J., Ee, H.C., Martin, G.R., and German, M.S. (1997). Genetic analysis reveals that PAX6 is required for normal transcription of pancreatic hormone genes and islet development. *Genes Dev.* *11*, 1662–1673.
- Sellick, G.S., Barker, K.T., Stolte-Dijkstra, I., Fleischmann, C., Coleman, R.J., Garrett, C., Gloyn, A.L., Edghill, E.L., Hattersley, A.T., Wellauer, P.K., et al. (2004). Mutations in PTF1A cause pancreatic and cerebellar agenesis. *Nat. Genet.* *36*, 1301–1305.
- Stoffers, D.A., Zinkin, N.T., Stanojevic, V., Clarke, W.L., and Habener, J.F. (1997). Pancreatic agenesis attributable to a single nucleotide deletion in the human IPF1 gene coding sequence. *Nat. Genet.* *15*, 106–110.
- Taraviras, S., Monaghan, A.P., Schutz, G., and Kelsey, G. (1994). Characterization of the mouse HNF-4 gene and its expression during mouse embryogenesis. *Mech. Dev.* *48*, 67–79.
- Teo, A.K., Arnold, S.J., Trotter, M.W., Brown, S., Ang, L.T., Chng, Z., Robertson, E.J., Dunn, N.R., and Vallier, L. (2011). Pluripotency factors regulate definitive endoderm specification through eomesodermin. *Genes Dev.* *25*, 238–250.
- Teo, A.K., Ali, Y., Wong, K.Y., Chipperfield, H., Sadasivam, A., Poo-balan, Y., Tan, E.K., Wang, S.T., Abraham, S., Tsuneyoshi, N., et al. (2012). Activin and BMP4 synergistically promote formation of definitive endoderm in human embryonic stem cells. *Stem Cells* *30*, 631–642.

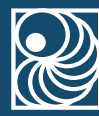

- Teo, A.K., Wagers, A.J., and Kulkarni, R.N. (2013a). New opportunities: harnessing induced pluripotency for discovery in diabetes and metabolism. *Cell Metab.* *18*, 775–791.
- Teo, A.K., Windmueller, R., Johansson, B.B., Dirice, E., Njolstad, P.R., Tjora, E., Raeder, H., and Kulkarni, R.N. (2013b). Derivation of human induced pluripotent stem cells from patients with maturity onset diabetes of the young. *J. Biol. Chem.* *288*, 5353–5356.
- Teo, A.K., Valdez, I.A., Dirice, E., and Kulkarni, R.N. (2014). Comparable generation of activin-induced definitive endoderm via additive Wnt or BMP signaling in absence of serum. *Stem Cell Rep.* *3*, 5–14.
- Teo, A.K., Tsuneyoshi, N., Hoon, S., Tan, E.K., Stanton, L.W., Wright, C.V., and Dunn, N.R. (2015). PDX1 binds and represses hepatic genes to ensure robust pancreatic commitment in differentiating human embryonic stem cells. *Stem Cell Rep.* *4*, 578–590.
- Thomas, H., Jaschowitz, K., Bulman, M., Frayling, T.M., Mitchell, S.M., Roosen, S., Lingott-Frieg, A., Tack, C.J., Ellard, S., Ryffel, G.U., et al. (2001). A distant upstream promoter of the HNF-4alpha gene connects the transcription factors involved in maturity-onset diabetes of the young. *Hum. Mol. Genet.* *10*, 2089–2097.
- Tjora, E., Wathle, G., Erchinger, F., Engjom, T., Molven, A., Aksnes, L., Haldorsen, I.S., Dimceviski, G., Raeder, H., and Njolstad, P.R. (2013). Exocrine pancreatic function in hepatocyte nuclear factor 1beta-maturity-onset diabetes of the young (HNF1B-MODY) is only moderately reduced: compensatory hypersecretion from a hypoplastic pancreas. *Diabet. Med.* *30*, 946–955.
- Wang, L., Coffinier, C., Thomas, M.K., Gresh, L., Eddu, G., Manor, T., Levitsky, L.L., Yaniv, M., and Rhoads, D.B. (2004). Selective deletion of the Hnf1beta (MODY5) gene in beta-cells leads to altered gene expression and defective insulin release. *Endocrinology* *145*, 3941–3949.
- Wen, J.H., Chen, Y.Y., Song, S.J., Ding, J., Gao, Y., Hu, Q.K., Feng, R.P., Liu, Y.Z., Ren, G.C., Zhang, C.Y., et al. (2009). Paired box 6 (PAX6) regulates glucose metabolism via proinsulin processing mediated by prohormone convertase 1/3 (PC1/3). *Diabetologia* *52*, 504–513.
- Yasuda, T., Kajimoto, Y., Fujitani, Y., Watada, H., Yamamoto, S., Watarai, T., Umayahara, Y., Matsuhisa, M., Gorogawa, S., Kuwayama, Y., et al. (2002). PAX6 mutation as a genetic factor common to aniridia and glucose intolerance. *Diabetes* *51*, 224–230.

**Stem Cell Reports, Volume 6**

**Supplemental Information**

**Early Developmental Perturbations in a Human Stem Cell Model of  
MODY5/HNF1B Pancreatic Hypoplasia**

**Adrian Kee Keong Teo, Hwee Hui Lau, Ivan Achel Valdez, Ercument Dirice, Erling Tjora, Helge Raeder, and Rohit N. Kulkarni**



## SUPPLEMENTAL INFORMATION

### SUPPLEMENTAL FIGURE LEGENDS

#### **“Figure S1. Establishment of a stem cell model for MODY5, Related to Figure 1”**

(A) S148L (C443T in exon 2) mutation (or lack thereof) in *HNF1B* has been verified in iN805 hiPSCs at least thrice. (B) Expression of pancreas-related (*NEUROD1*, *HNF6*, *DLK1*, *SOX4* and *MAFB*) markers in hiPSCs differentiated for 17 days. All error bars indicate standard deviation of three biological replicates in an independent experiment. (C) Immunostaining for HNF1B, PAX6, ISL1, SOX9 and PDX1 on hiPSCs differentiated for 12 days. Scale bar: 200  $\mu$ m. (D) The percentage of PDX1<sup>+</sup>, SOX9<sup>+</sup>, HNF1B<sup>+</sup>, HNF1A<sup>+</sup> and PTF1A<sup>+</sup> cells after differentiation of hiPSCs for 17 days.

#### **“Figure S2. Transcriptional perturbations in MODY5-hiPSC-derived pancreatic progenitors, Related to Figures 1, 2 and 3”**

(A) Gene ontology (GO) analyses of differentially up- and down-regulated genes (fold change >2) in control hiPSCs differentiated for 10 days. (B) Gene expression of *SOX17*, *FOXA2*, *ISL1*, *HLXB9*, *SOX9* and *RFX6* in non-family control and iN805 hiPSCs differentiated for 0, 12, 14 and 17 days. Data are representative of at least 2 independent hiPSC lines per subject. The experiment was replicated at least twice. All error bars indicate standard deviation of three biological replicates in an independent experiment. (C) Immunostaining for HNF1B, SOX9 and ISL1 on iN805 hiPSCs differentiated for 12 days. Data are

representative of at least 2 independent hiPSC lines per subject. The experiment was replicated at least twice. Scale bar: 200  $\mu\text{m}$ .

**“Figure S3. Further characterization of pancreatic differentiation model for**

**MODY5-hiPSCs, Related to Figures 2 and 3”** (A) Gene expression heat map of

representative pancreas-related genes in undifferentiated (first four columns), Day 12 differentiated (middle four columns) and Day 17 differentiated (last four columns) control and iN805 hiPSCs (up-regulation in red, down-regulation in blue). The colors in the heat map depict gene expression in units of standard deviation from the mean across all samples. GO analyses of differentially up- and down-regulated genes (fold change >2) in iN805 versus control cells on (B) Day 12 or (C) Day 17. (D) ChIP demonstrates that HNF1B is bound onto genomic loci of *HLXB9* and *HNF1B* on Day 12. (E) Cell count was performed on control and iN805 hiPSCs differentiated for 17 days. All error bars indicate standard deviation of three biological replicates in an independent experiment.

**“Figure S4. HNF1B has no impact on *HNF4A* or *SOX9* transcription, Related to**

**Figure 4”** (A) Luciferase assay showing the effect of *HNF1B* overexpression on *HNF4A*

transcriptional activity in hiPSCs differentiated for 12 days. Expression of *SOX9* in hiPSCs differentiated for 10 days and overexpressing increasing amounts of (B) mutant *HNF1B*<sup>S148L</sup> or (C) *HNF1B* from Day 7-10. Control experiments demonstrating that the overexpression of (D) HNF1B or (E) HNF1A is successful. Experiments were replicated

at least twice. All error bars indicate standard deviation of three biological replicates in an independent experiment.

## **SUPPLEMENTAL TABLE LEGENDS**

**“Table S1.** Microarray performed on undifferentiated and Day 10 differentiated control-hiPSCs, Related to Figure 1”

**“Table S2.** Microarray performed on undifferentiated, Day 12 and Day 17 differentiated control and iN805 hiPSCs, Related to Figures 2 and 3”

**“Table S3.** Primers and antibodies used, Related to Figures 1, 2, 3, 4 and 5”



Figure S1: Teo et al.,

**A**

**MODY5 (*HNF1B*) (S148L)**

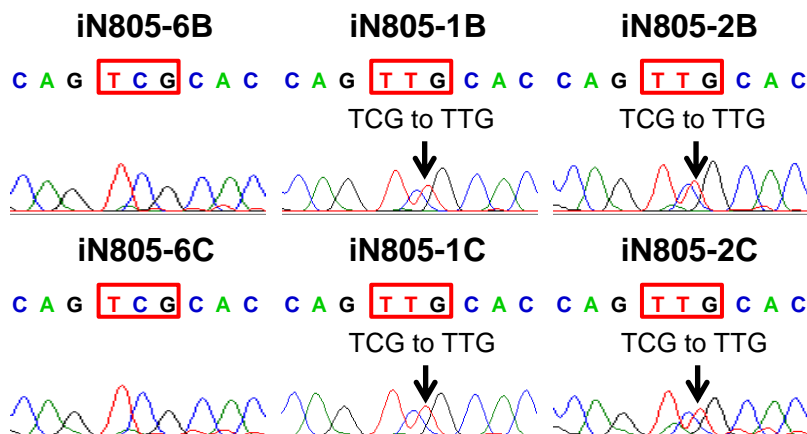

**B**

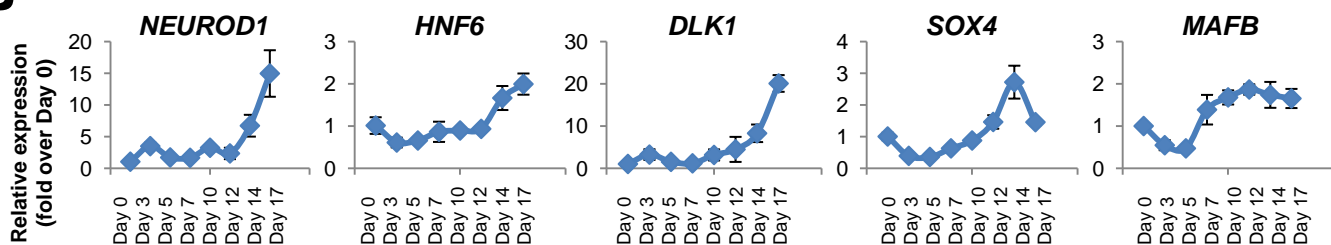

**C**

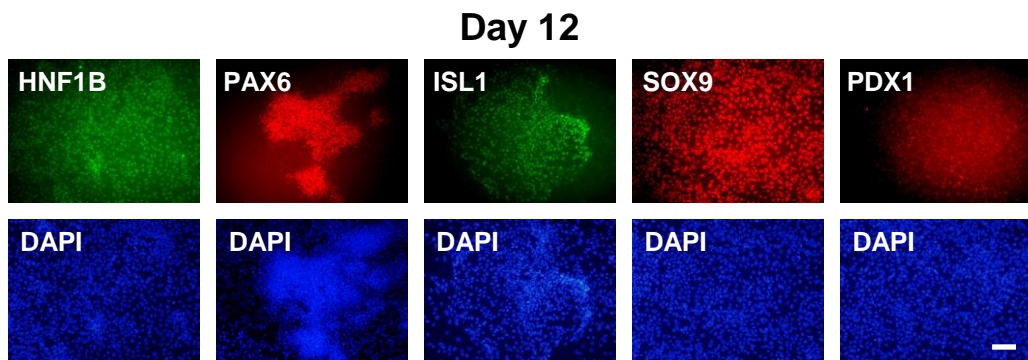

**D**

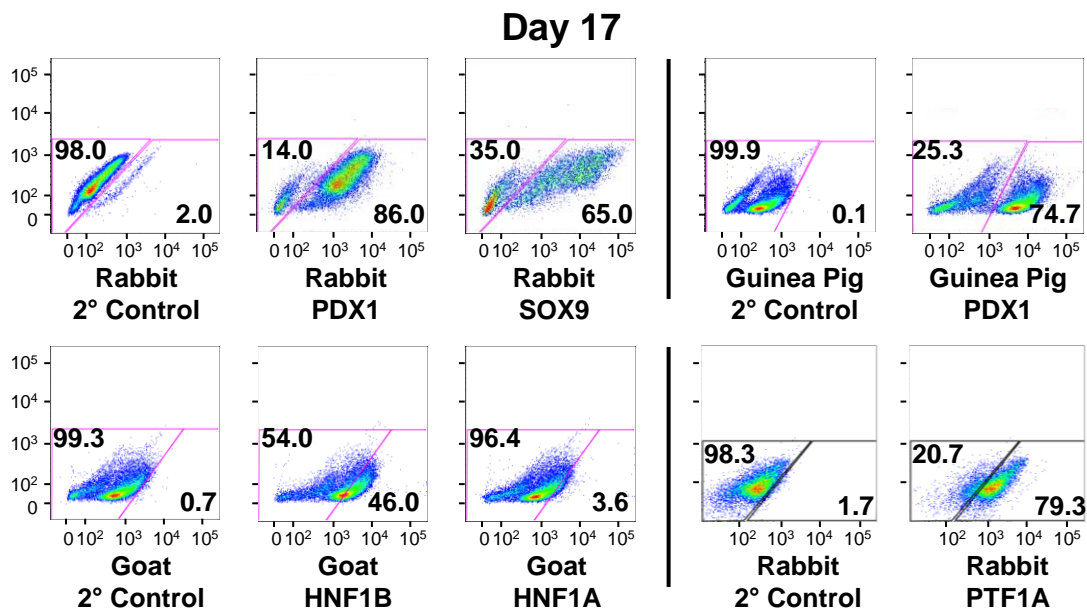

Figure S2: Teo et al.,

**A**

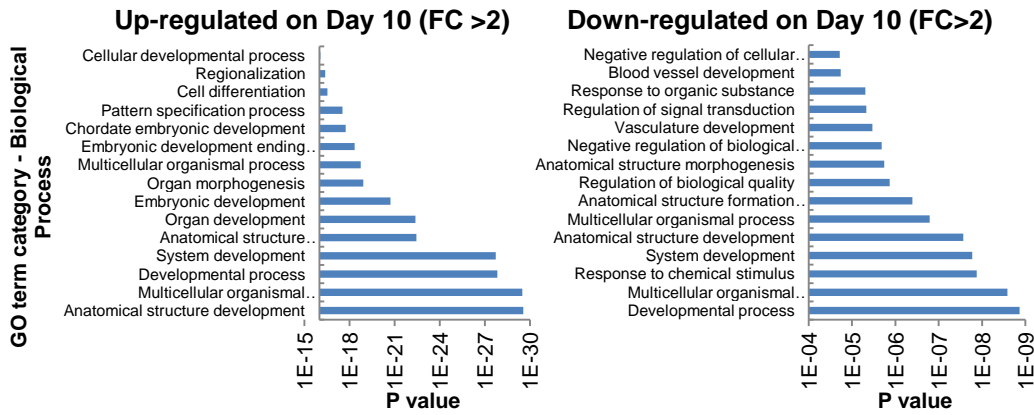

**B**

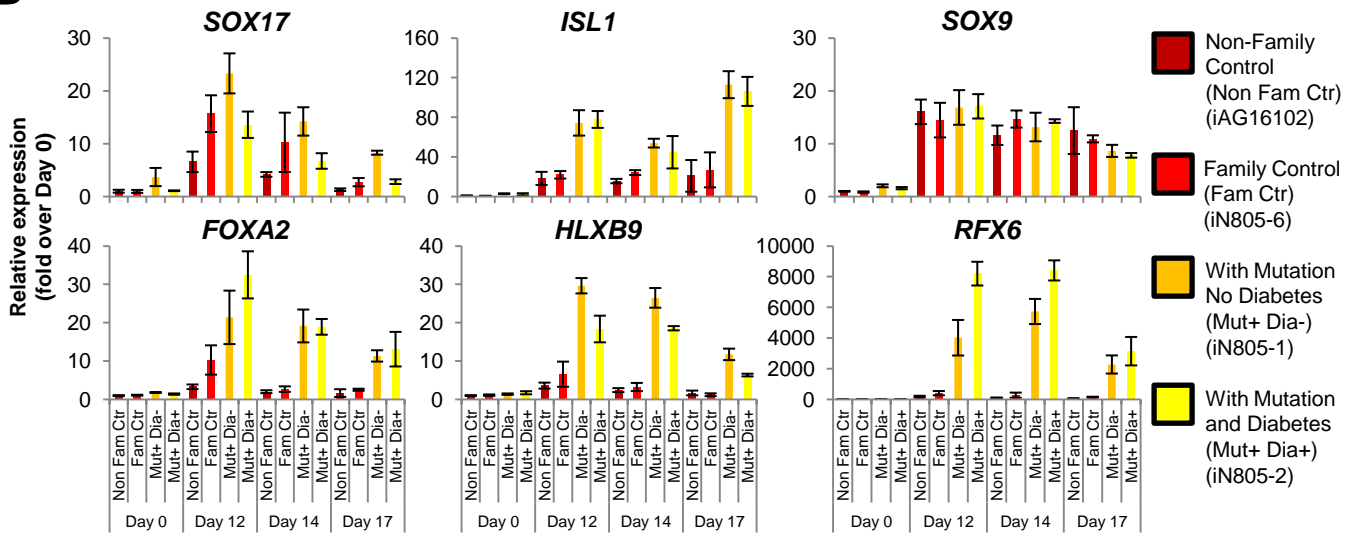

**C**

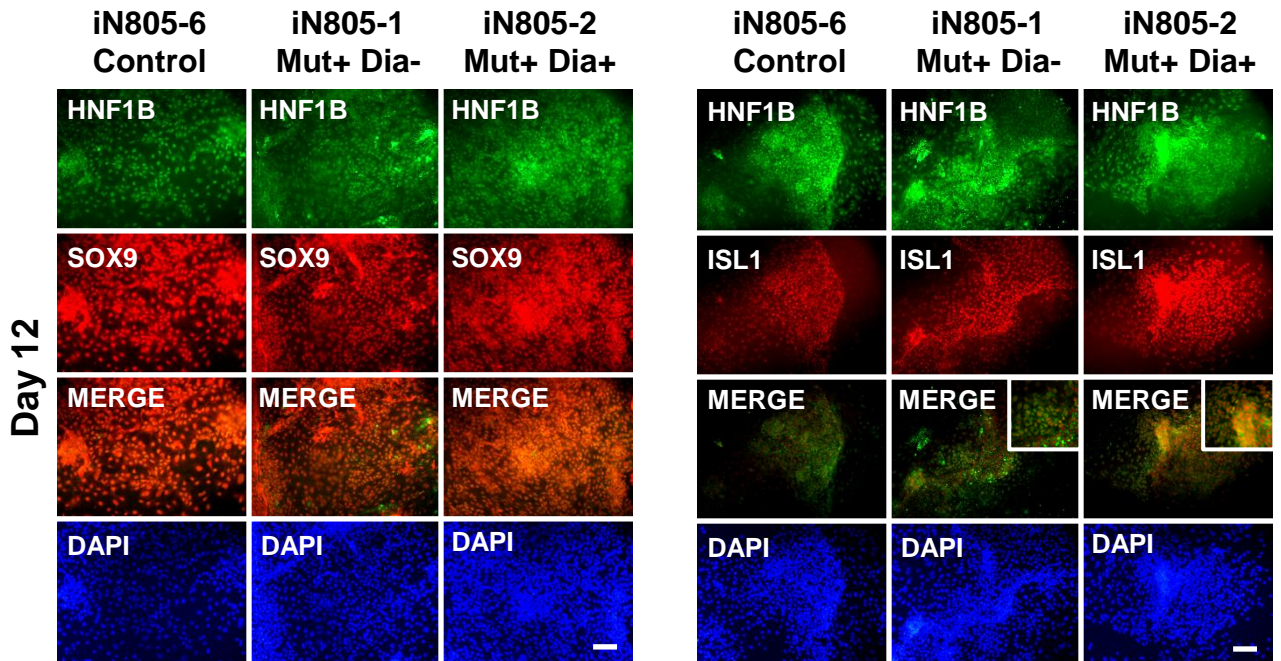

Figure S3: Teo et al.,

**A**

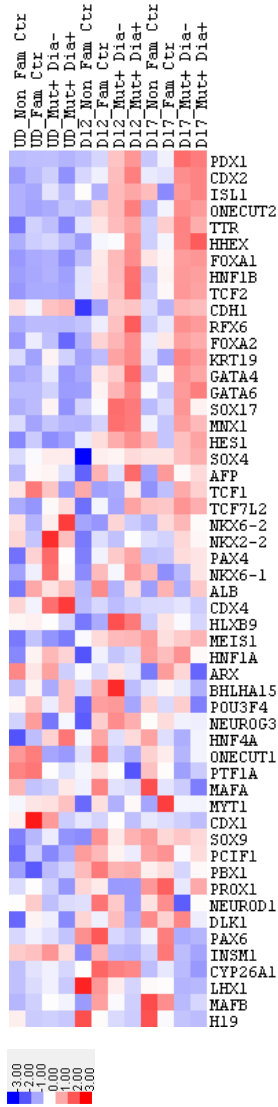

**B**

GO term category - Biological Process

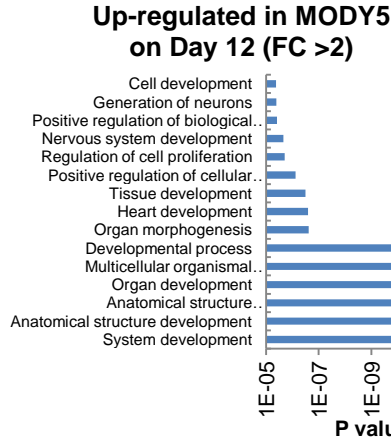

**Down-regulated in MODY5 on Day 12 (FC >2)**

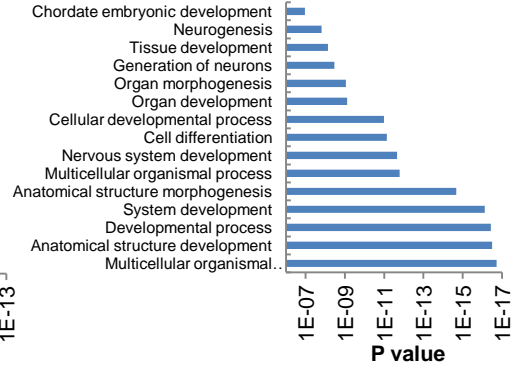

**C**

GO term category - Biological Process

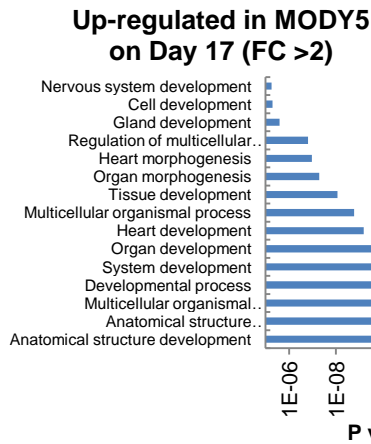

**Down-regulated in MODY5 on Day 17 (FC >2)**

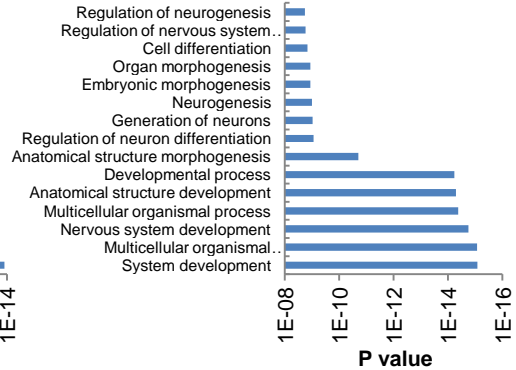

**D**

**HLXB9 genomic locus**

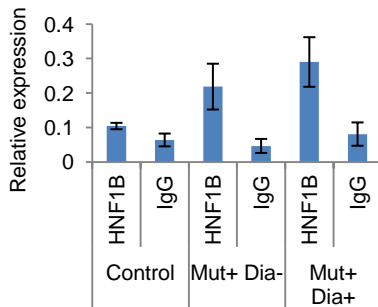

**HNF1B genomic locus**

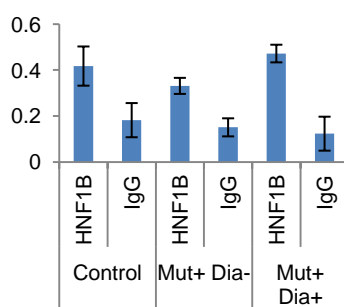

**E**

**Cell count during differentiation**

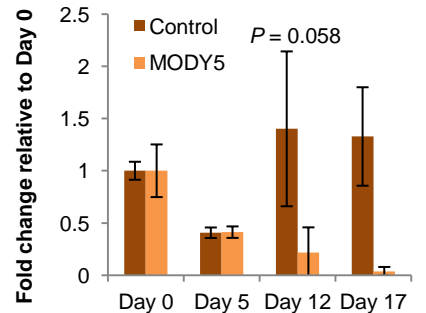

Figure S4: Teo et al.,

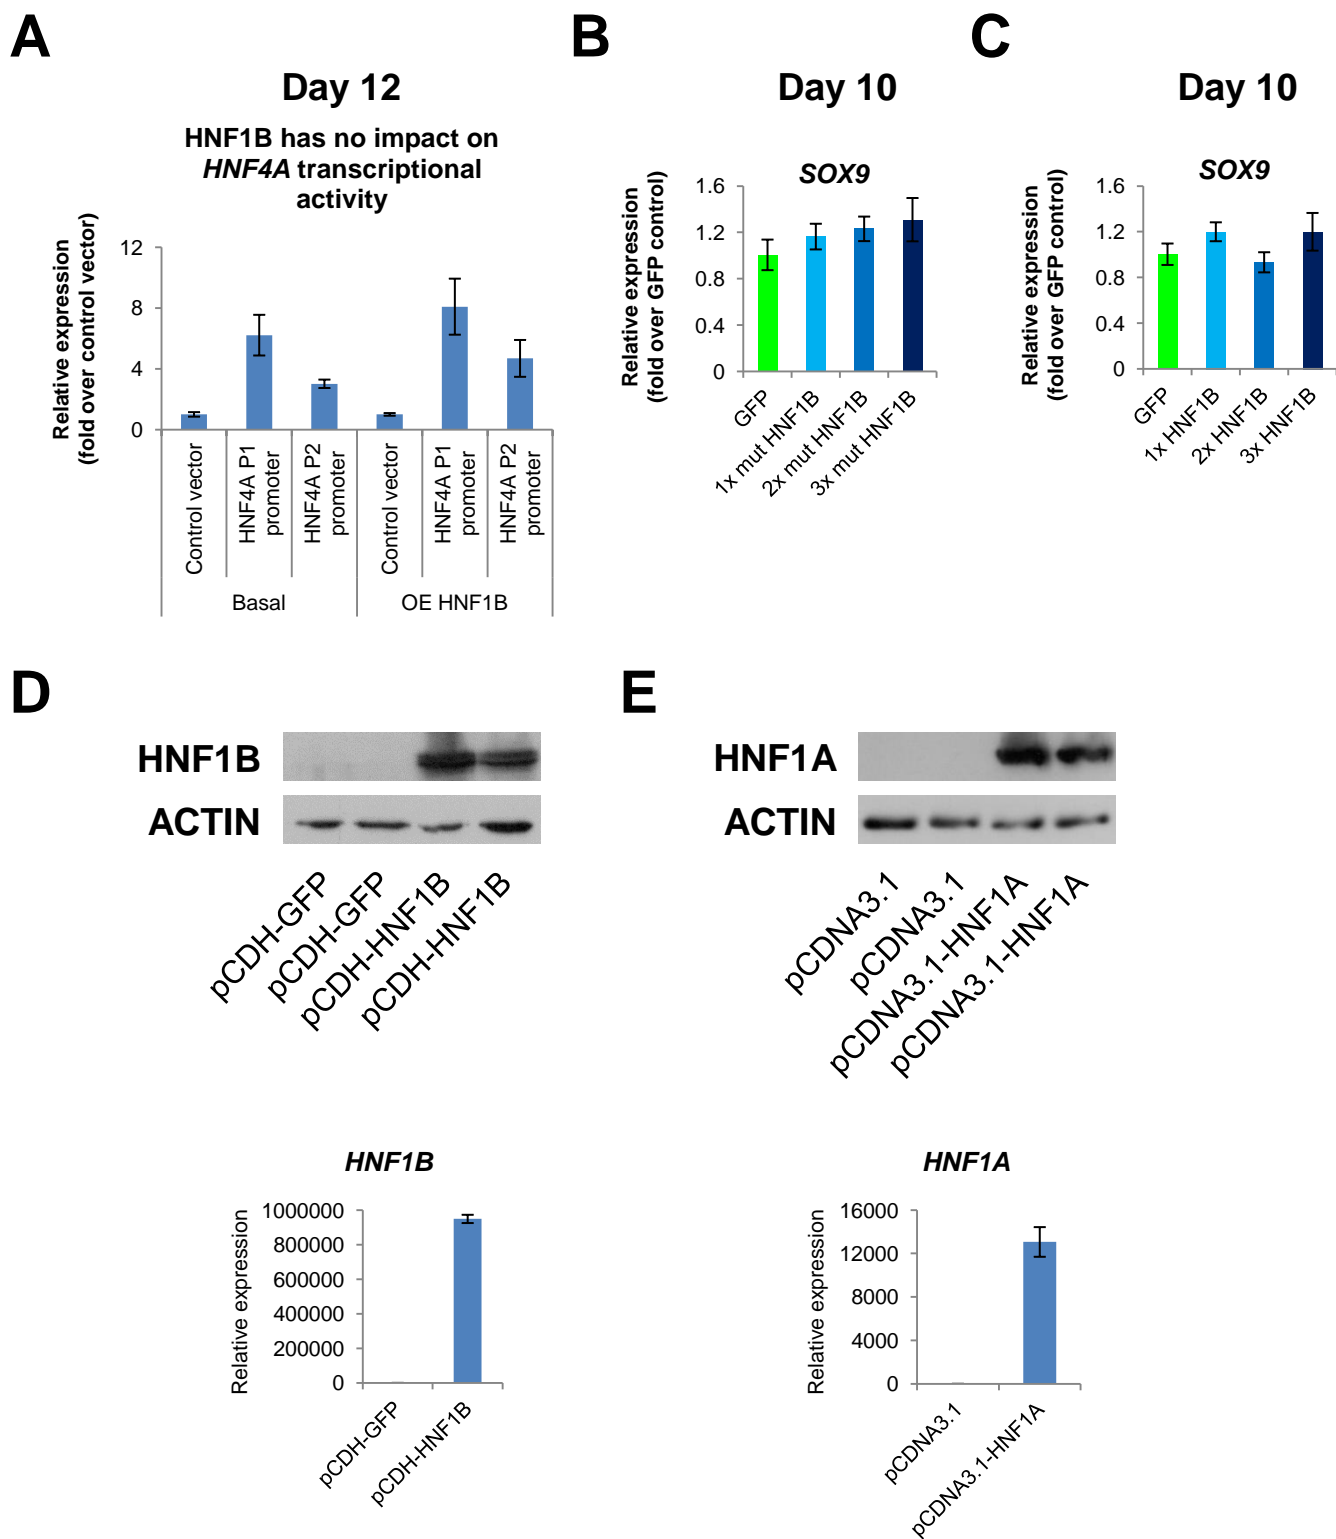

Supplement: mmc5.pdf [file mmc5.pdf]
